# Supplementary material for: LRRK2 levels in immune cells are increased in Parkinson’s disease
Source: PubMed Central journal article supplement (PMC5459798; doi:10.1038/s41531-017-0010-8), 2017-03-28
Supplement: 41531_2017_10_MOESM4_ESM.pdf [file 41531_2017_10_MOESM4_ESM.pdf]

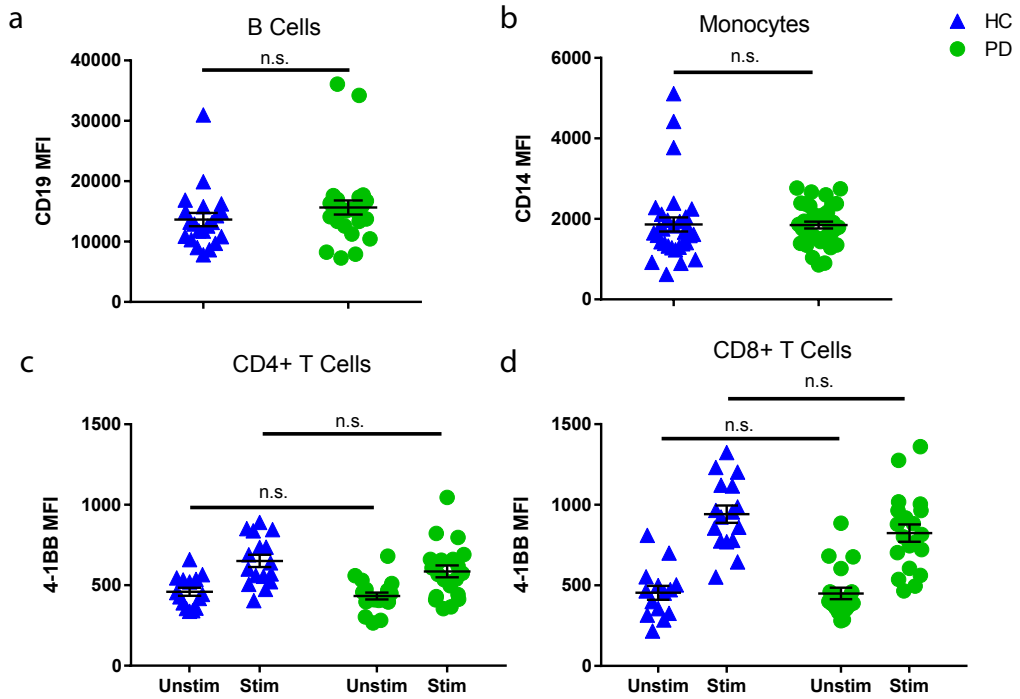

Supplementary Figure S2
